# Supplementary material
Source: bioRxiv or medRxiv preprint supplement (https://www.biorxiv.org/content/biorxiv/early/2019/04/22/615948/DC1/embed/media-1.pdf)
Supplement: Supplementary file [file media-1.pdf]

**Fig S1**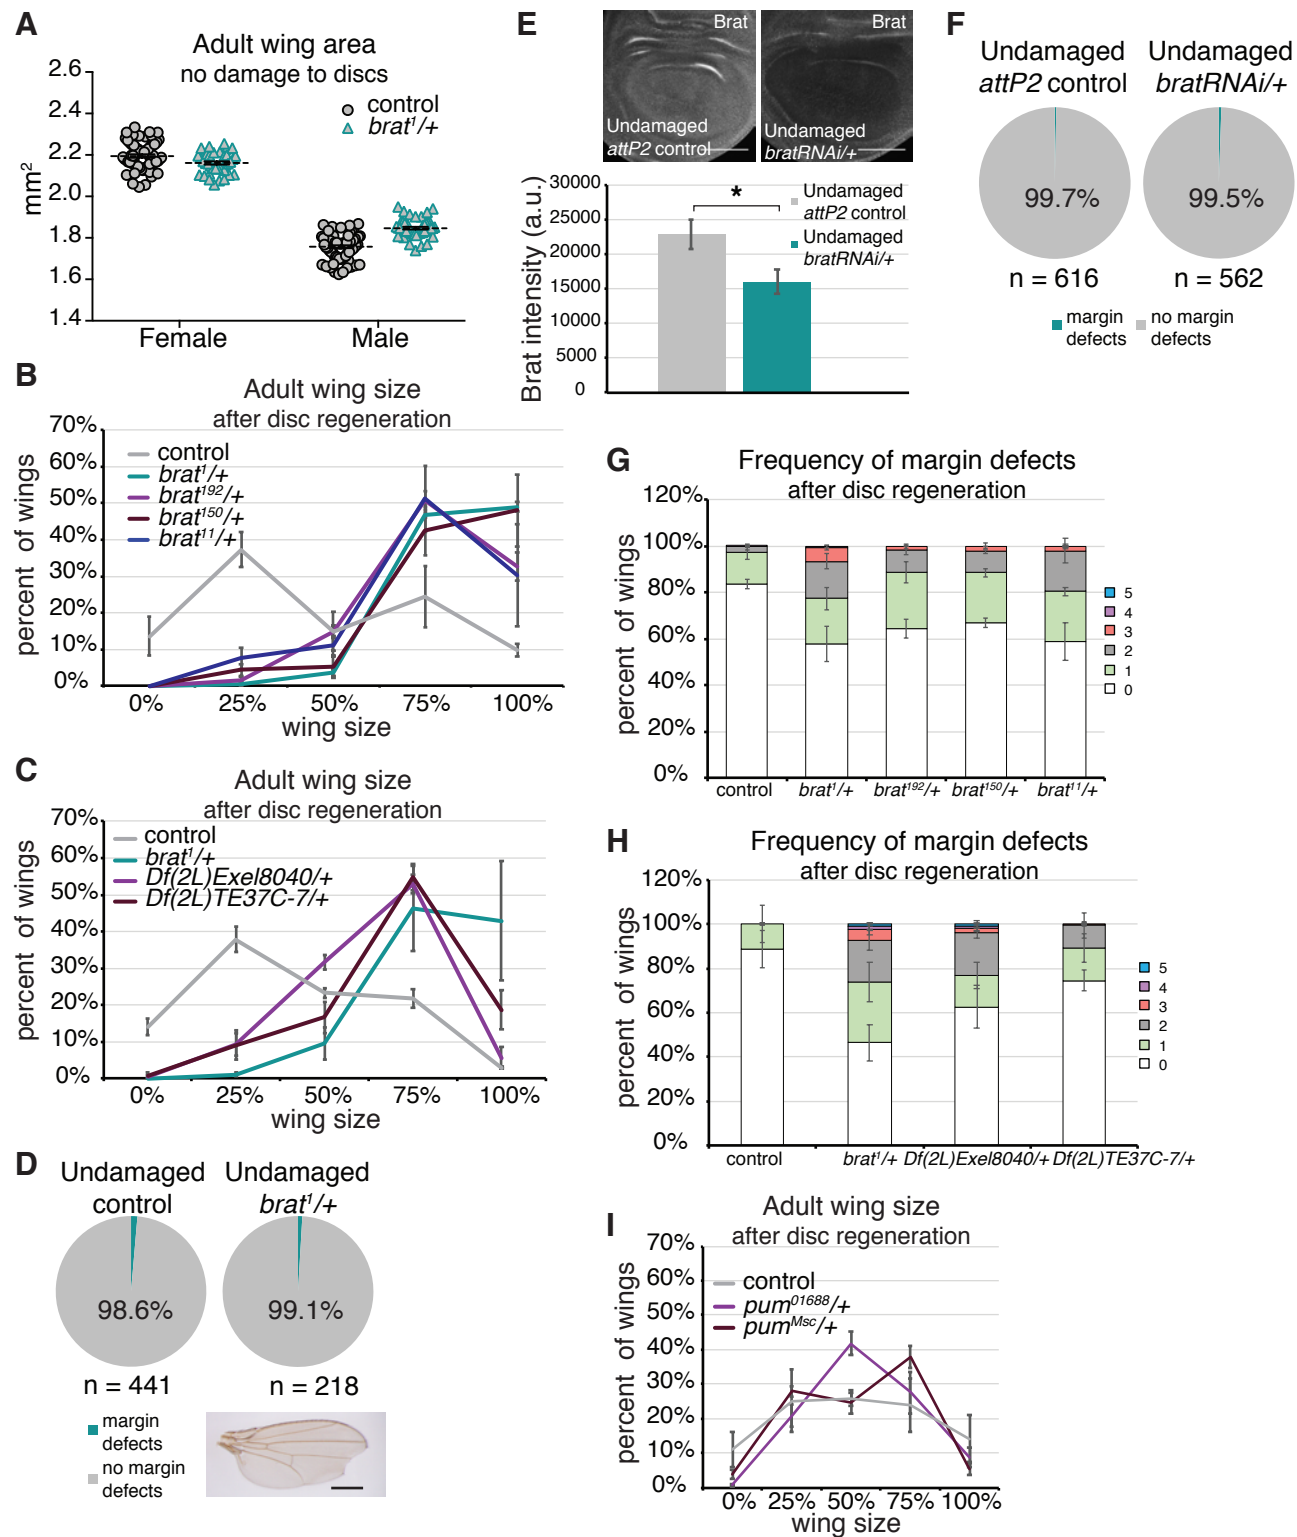

**S1 Fig. Loss of *brat* does not cause enhanced growth or margin defects during normal development.**

(A) Adult wing area measured using ImageJ after mounting and imaging wings, for undamaged control ( $w^{1118}$ ) (n = 63 female and 70 male) and *brat*<sup>1/+</sup> (n = 38 female and 48 male) wings. *rnGAL4, GAL80<sup>ts</sup>/TM6B* females were crossed to  $w^{1118}$  or *brat*<sup>1/SM6-TM6B</sup> males and taken through the protocol shown in Fig 1A. (B) Adult wing sizes after disc regeneration for control ( $w^{1118}$ ) (n = 599), *brat*<sup>1/+</sup> (n = 199), *brat*<sup>192/+</sup> (n = 237), *brat*<sup>150/+</sup> (n = 235) and *brat*<sup>11/+</sup> (n = 188) wings, from three independent experiments. (C) Adult wing sizes after disc regeneration for control ( $w^{1118}$ ) (n = 396), *brat*<sup>1/+</sup> (n = 252), *Df(2L)Exel8040/+* (n = 208) and *Df(2L)TE37C-7/+* (n = 271) wings, from three independent experiments. (D) Margin defects detected in adult wings from undamaged control ( $w^{1118}$ ) and *brat*<sup>1/+</sup> discs. *rnGAL4, GAL80<sup>ts</sup>/TM6B* females were crossed to  $w^{1118}$  or *brat*<sup>1/SM6-TM6B</sup> males and taken through the protocol shown in Fig 1A. Margin defects detected in the undamaged wings were never as severe as the ones seen in *brat*<sup>1/+</sup> wings after disc regeneration. A representative wing with margin defects is shown. (E) Anti-Brat immunostaining in undamaged control (*attP2*) and *bratRNAi/+* discs. *rnGAL4, GAL80<sup>ts</sup>/TM6B* females were crossed to *attP2* or *bratRNAi* males. Larvae were kept at 18°C and shifted to 30°C on day 7 AEL. Discs were dissected 24 hours after the shift to 30°C. Quantification of Brat fluorescence intensity in undamaged control (*attP2*) (n = 15) and *bratRNAi/+* (n = 15) discs. Area for fluorescence intensity measurement was defined by wing pouch morphology and Anti-Myc co-immunostaining. \* p = 0.02. (F) Margin defects detected in adult wings from undamaged control (*attP2*) and *bratRNAi* discs. *rnGAL4, GAL80<sup>ts</sup>/TM6B* females were crossed to *attP2* or *bratRNAi*

males. Larvae were kept at 18°C and shifted to 30°C on day 7 AEL and kept there until eclosion. (G) Frequency of margin defects seen in adult wings after disc regeneration for control (*w<sup>1118</sup>*) (n = 240), *brat<sup>1</sup>/+* (n = 191), *brat<sup>192</sup>/+* (n = 196), *brat<sup>150</sup>/+* (n = 213) and *brat<sup>11</sup>/+* (n = 152) wings. Wings in (G) are from the same experiments as (B). (H) Frequency of margin defects seen in adult wings after disc regeneration for control (*w<sup>1118</sup>*) (n = 98), *brat<sup>1</sup>/+* (n = 223), *Df(2L)Exel8040/+* (n = 117) and *Df(2L)TE37C-7/+* (n = 194) wings. Wings in (H) are from the same experiments as (C). (I) Adult wing sizes after disc regeneration for control (*w<sup>1118</sup>*) (n = 333), *pum<sup>01688</sup>/+* (n = 241) and *pum<sup>Msc</sup>/+* (n = 160) wings, from three independent experiments. Error bars represent SEM. Student's T-test used for statistical analyses. Scale bars are 100 µm.

**Fig S2**

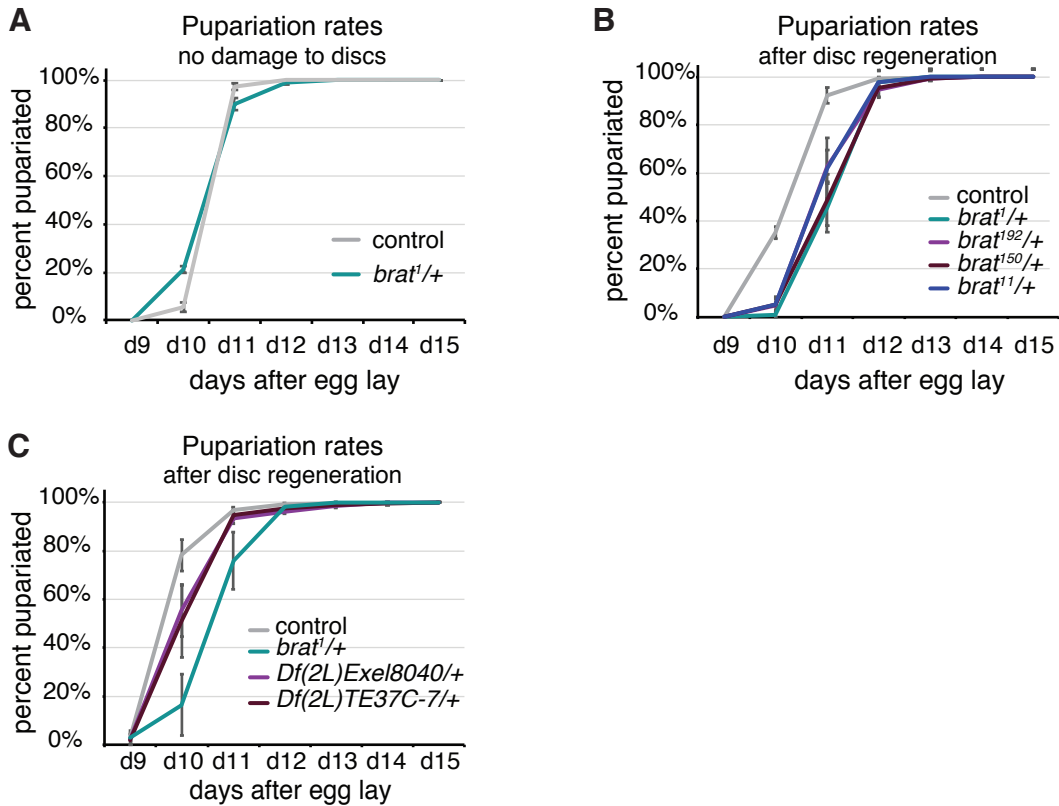

**S2 Fig. Loss of *brat* delays pupariation in a regeneration-specific manner.**

(A) Pupariation rates in undamaged control ( $w^{1118}$ ) (n = 221) and *brat*<sup>1/+</sup> (n = 110) animals, from three independent experiments. (B) Pupariation rates after disc regeneration for control ( $w^{1118}$ ) (n = 384), *brat*<sup>1/+</sup> (n = 107), *brat*<sup>192/+</sup> (n = 131), *brat*<sup>150/+</sup> (n = 114) and *brat*<sup>11/+</sup> (n = 113) animals. Pupariation rates are from the same experiments as in Fig 2A. (C) Pupariation rates after disc regeneration for control ( $w^{1118}$ ) (n = 251), *brat*<sup>1/+</sup> (n = 146), *Df(2L)Exel8040/+* (n = 149) and *Df(2L)TE37C-7/+* (n = 162) animals, from three independent experiments. Error bars represent SEM.

**Fig S3**

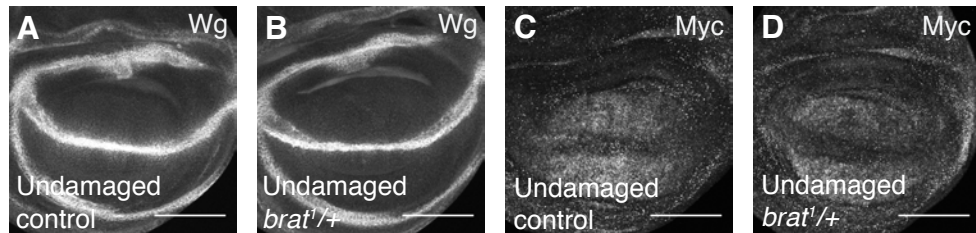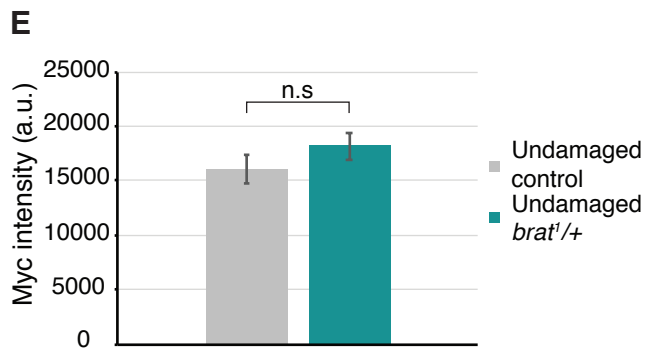

**S3 Fig. Effects of loss of *brat* on Wg and Myc expression are regeneration-specific.**

(A-B) Anti-Wg immunostaining in an undamaged control ( $w^{1118}$ ) disc (A) and an undamaged *brat*<sup>1/+</sup> disc (B). (C-D) Anti-Myc immunostaining in an undamaged control ( $w^{1118}$ ) disc (C) and an undamaged *brat*<sup>1/+</sup> disc (D). (E) Quantification of Myc fluorescence intensity in undamaged control ( $w^{1118}$ ) (n = 10) and *brat*<sup>1/+</sup> (n = 10) discs. Area for fluorescence intensity measurement was defined by wing pouch morphology and the elevated Myc expression domain in the wing pouch. Error bars represent SEM. Student's T-test used for statistical analyses. Scale bars are 100  $\mu$ m.

**Fig S4**

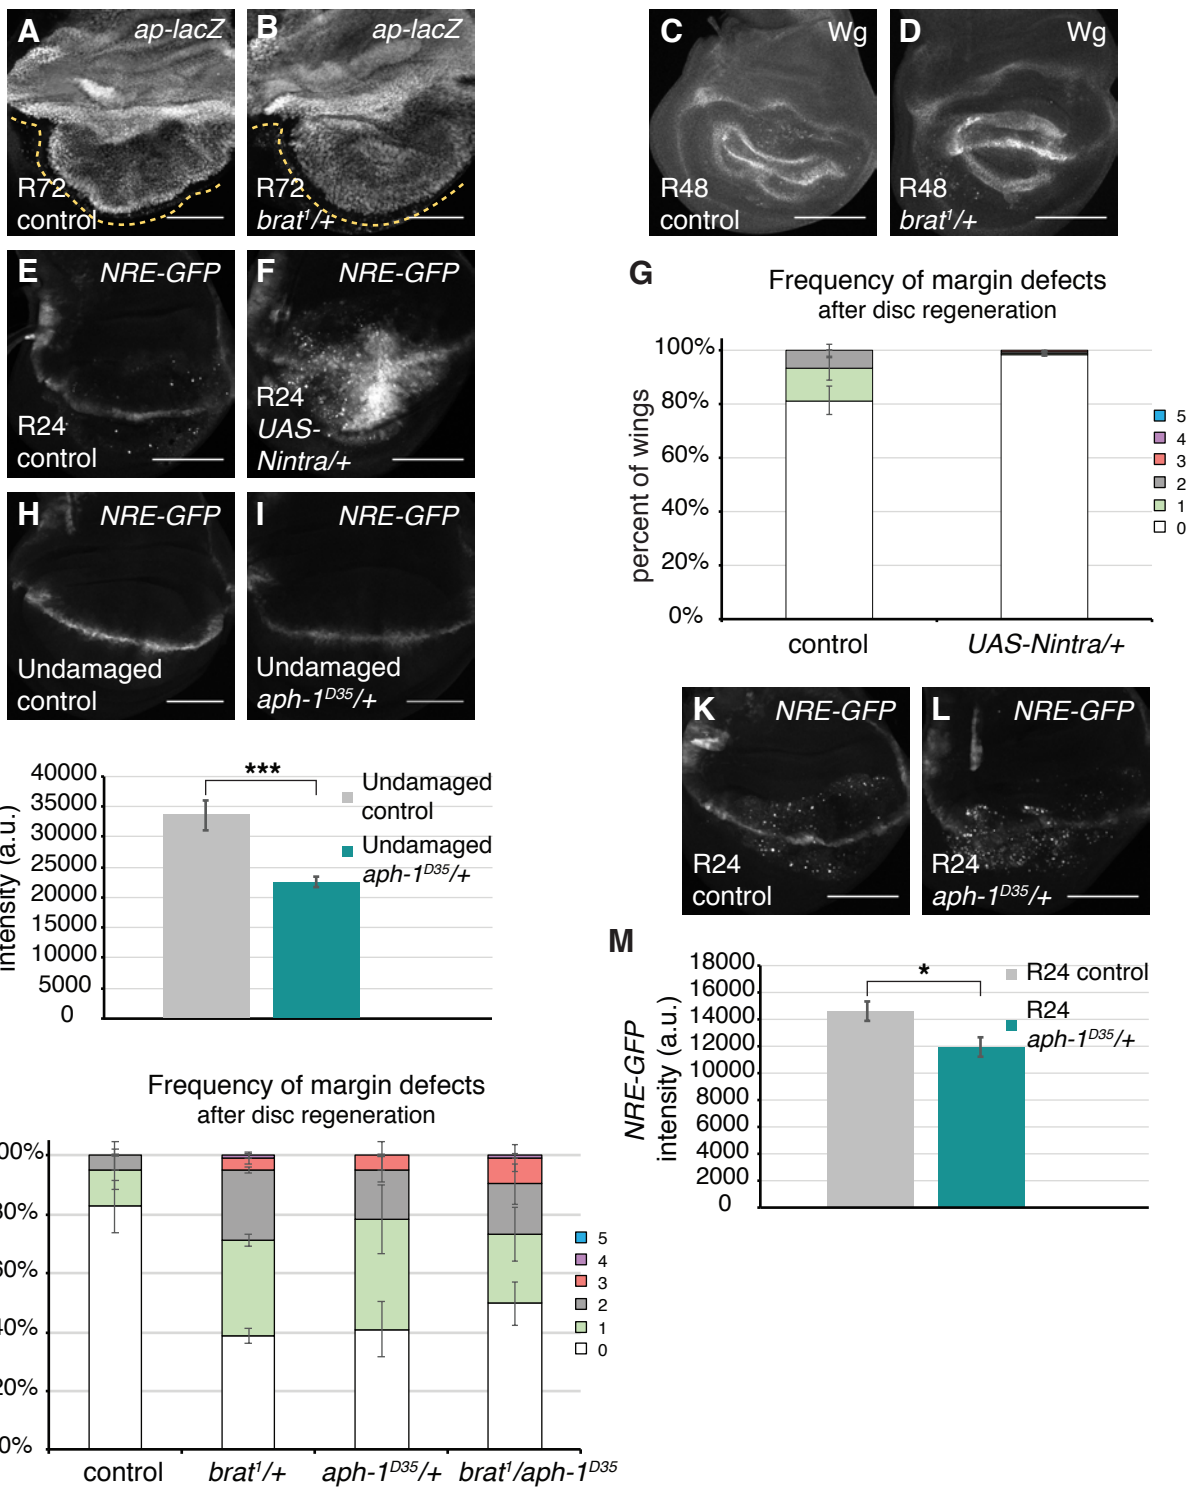



#### S4 Fig. Elevated Notch signaling does not cause margin defects.

(A-B) *ap-lacZ* expression in an R72 control ( $w^{1118}$ ) disc (A) and an R72 *brat*<sup>1/+</sup> disc (B).

Dashed yellow lines are drawn next to the DV boundary to highlight it. (C-D) Anti-Wg

immunostaining in an R48 control ( $w^{1118}$ ) disc (C) and an R48 *brat*<sup>1/+</sup> disc (D). (E-F)

*NRE-GFP* expression in an R24 control ( $w^{1118}$ ) disc (E) and an R24 *UAS-Nintra*/+ disc

(F). (G) Frequency of margin defects seen in adult wings after disc regeneration for

control ( $w^{1118}$ ) (n = 84) and *UAS-Nintra*/+ (n = 357) wings, from five independent

experiments. (H-I) *NRE-GFP* expression in an undamaged control ( $w^{1118}$ ) disc (H) and

an undamaged *aph-1*<sup>D35</sup>/+ disc (I). *NRE-GFP*/+ and *NRE-GFP/aph-1*<sup>D35</sup> animals were

raised at room temperature and dissected during third instar. (J) Quantification of GFP

intensity in undamaged control ( $w^{1118}$ ) (n = 15) and *aph-1*<sup>D35</sup>/+ (n = 15) discs. \*\*\* p <

0.0006. (K-L) *NRE-GFP* expression in an R24 control ( $w^{1118}$ ) disc (K) and an R24 *aph-*

*1*<sup>D35</sup>/+ disc (L). (M) Quantification of GFP intensity in R24 control ( $w^{1118}$ ) (n = 13) and

R24 *aph-1*<sup>D35</sup>/+ (n = 11) discs. \* p < 0.02. (N) Frequency of margin defects in adult

wings after disc regeneration for control ( $w^{1118}$ ) (n = 21), *brat*<sup>1/+</sup> (n = 137), *aph-1*<sup>D35</sup>/+ (n

= 38) and *brat*<sup>1</sup>/*aph-1*<sup>D35</sup> (n = 80) wings. Error bars represent SEM. Student's T-test used

for statistical analyses. Scale bars are 100  $\mu$ m.

**Fig S5**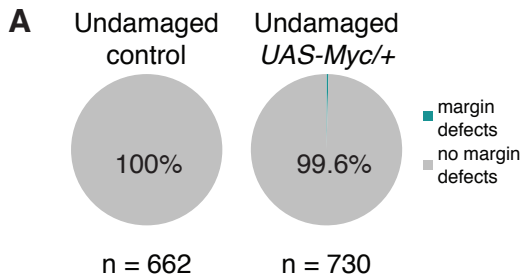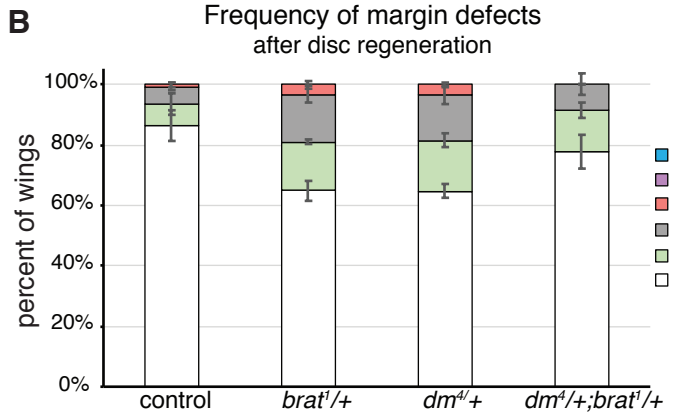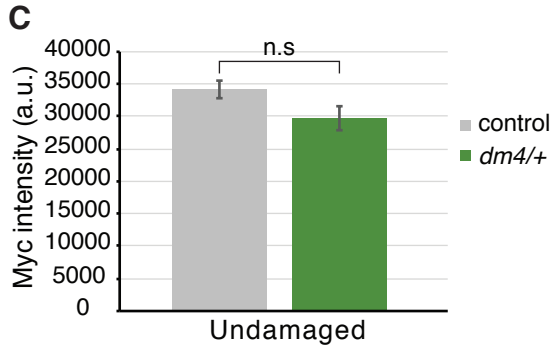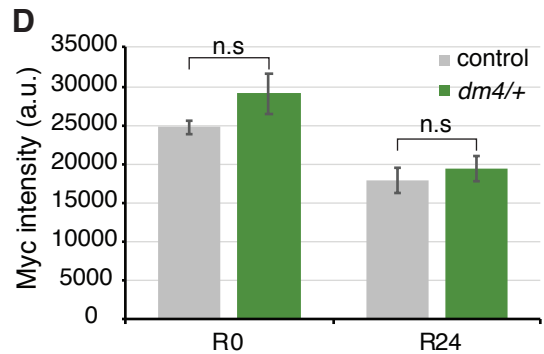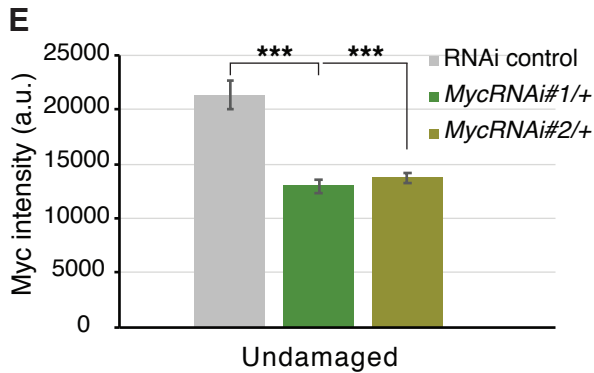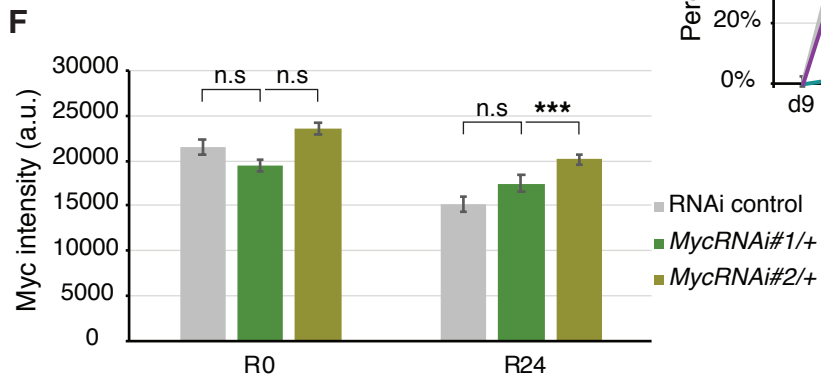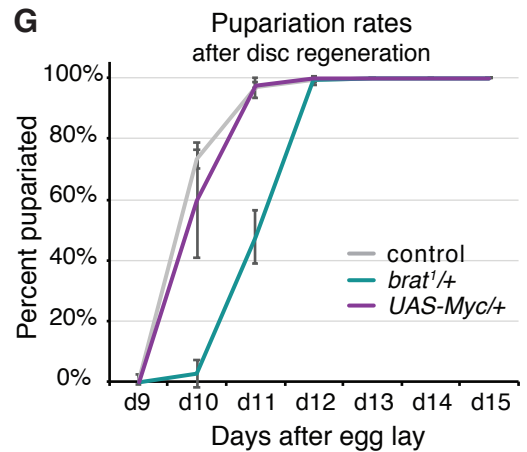

**S5 Fig. Compensatory regulation prevents reduction of Myc expression during regeneration.**

(A) Margin defects detected in adult wings from undamaged control ( $w^{1118}$ ) and *UAS-Myc/+* discs. *rnGAL4, GAL80<sup>ts</sup>/TM6B* females were crossed to  $w^{1118}$  or *UAS-Myc* males and taken through the protocol shown in Fig 1A. (B) Frequency of margin defects in adult wings after disc regeneration for control ( $w^{1118}$ ) (n = 103), *brat<sup>1</sup>/+* (n = 203), *dm<sup>4</sup>/+* (n = 94) and *dm<sup>4</sup>/+; brat<sup>1</sup>/+* (n = 94) wings, from three independent experiments. (C) Quantification of Myc fluorescence intensity in undamaged control ( $w^{1118}$ ) (n = 12) and *dm<sup>4</sup>/+* (n = 11) discs.  $w^{1118}$  females were crossed to  $w^{1118}$  or *dm<sup>4</sup>/FM7i, ActGFP* males and dissected when the animals were third instar. Area for fluorescence intensity measurement was defined by wing pouch morphology and the elevated Myc expression domain in the wing pouch. (D) Quantification of Myc fluorescence intensity in R0 control ( $w^{1118}$ ) (n = 13), R0 *dm<sup>4</sup>/+* (n = 10), R24 control ( $w^{1118}$ ) (n = 13), and R24 *dm<sup>4</sup>/+* (n = 10) discs. Area for fluorescence intensity measurement was defined by the elevated Myc expression domain in the wing pouch. (E) Quantification of Myc fluorescence intensity in undamaged control (VDRC genetic background line, called control) (n = 14), *MycRNAi#1/+* (n = 12), and *MycRNAi#2/+* (n = 13) discs. *rnGAL4, GAL80<sup>ts</sup>/TM6B* females were crossed to the control, *MycRNAi#1*, or *MycRNAi#2* males. The animals were shifted to 30°C during early third instar and kept there for 28 hours then dissected. *MycRNAi#1/+* \*\*\* p < 0.000007, *MycRNAi#2/+* \*\*\* p < 0.00002. Area for fluorescence intensity measurement was defined by wing pouch morphology. (F) Quantification of Myc fluorescence intensity in R0 control (n = 13), R0 *MycRNAi#1/+* (n = 15), R0 *MycRNAi#2/+* (n = 13), R24 control (n = 13), R24 *MycRNAi#1/+* (n = 13), and R24

*MycRNAi#2/+* (n = 13) discs. Fluorescence intensity was measured in the area marked by Anti-Nubbin immunostaining. \*\*\* p < 0.00007. (G) Pupariation rates after disc regeneration for control (*w<sup>1118</sup>*) (n = 216), *brat<sup>1/+</sup>* (n = 114) and *UAS-Myc/+* (n = 209) animals, from three independent experiments. Error bars represent SEM. Student's T-test used for statistical analyses. Scale bars are 100  $\mu$ m.

**Fig S6**

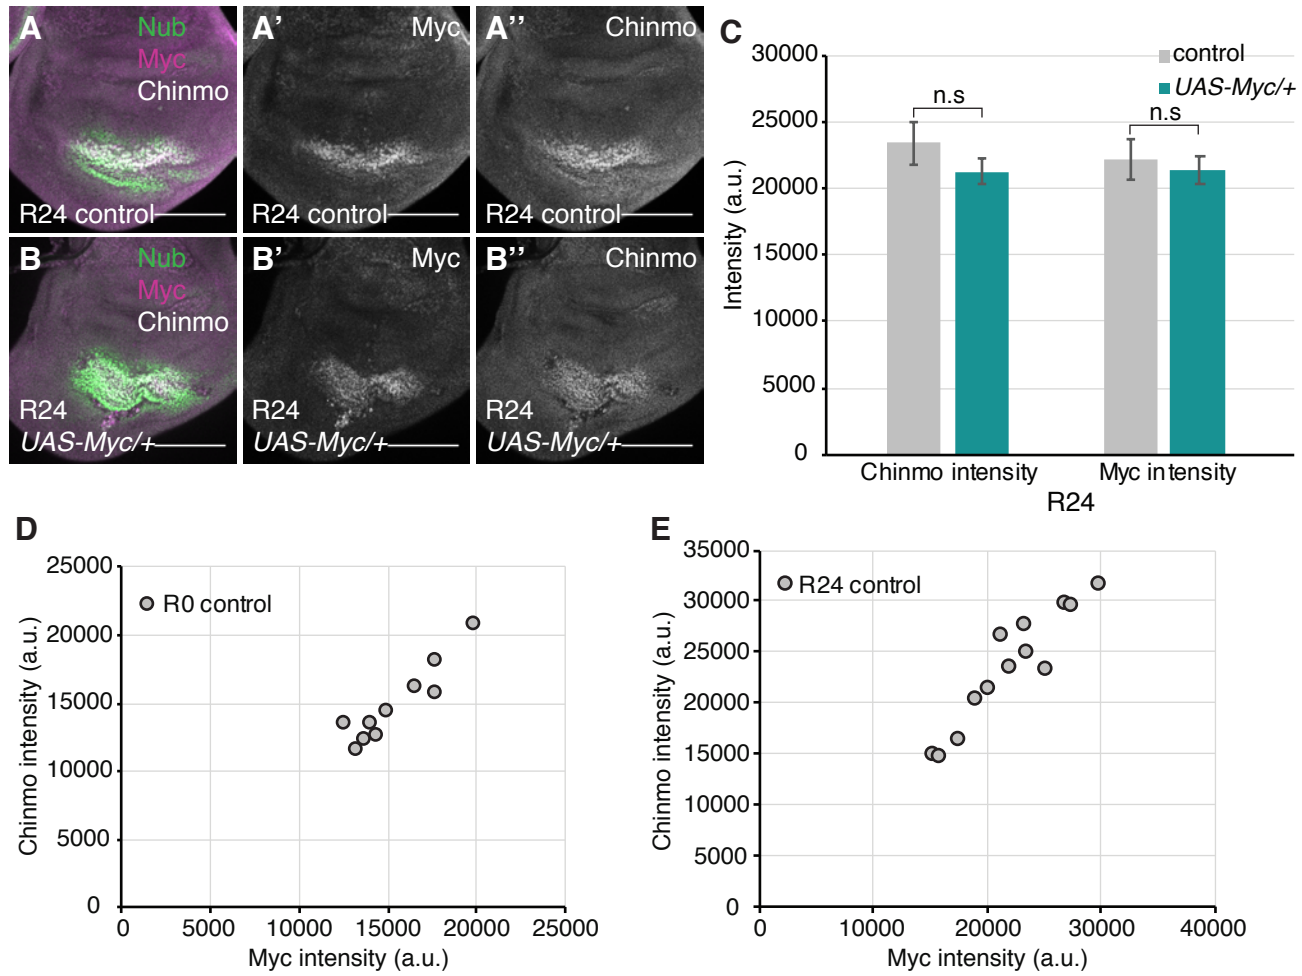

## S6 Fig. Myc regulates Chinmo expression.

(A) Merge of anti-Nubbin, anti-Myc and anti-Chinmo immunostaining in an R24 control ( $w^{1118}$ ) disc. (A'-A'') Same disc as (A) showing anti-Myc and anti-Chinmo immunostaining, respectively. (B) Merge of anti-Nubbin, anti-Myc and anti-Chinmo immunostaining in an R24 *UAS-Myc/+* disc. (B'-B'') Same disc as (B) showing anti-Myc and anti-Chinmo immunostaining, respectively. (C) Quantification of Chinmo and Myc fluorescence intensity in R24 control ( $w^{1118}$ ) (n = 13) and R24 *UAS-Myc/+* (n = 14) discs. Area for fluorescence intensity measurement was defined by the elevated Myc expression domain in the wing pouch. Note that Myc and Chinmo expression co-localize. (D-E) Scatter plot showing correlation between Myc and Chinmo expression levels at R0 (D) and R24 (E). Pearson correlation coefficient for R0 = 0.93 and R24 = 0.94. Error bars represent SEM. Student's T-test used for statistical analyses. Scale bars are 100  $\mu\text{m}$ .
